# Supplementary material for: Rapid increase in transferrin receptor recycling promotes adhesion during T cell activation
Source: PubMed Central journal article supplement (PMC9400314; doi:10.1186/s12915-022-01386-0), 2022-08-24

# Jurkat pZap70

## Replicate 1

aTfR | ctrl

Anti-pZap70

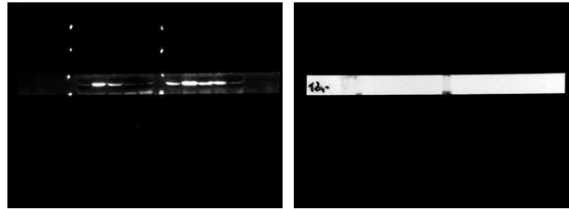

Anti-b-actin

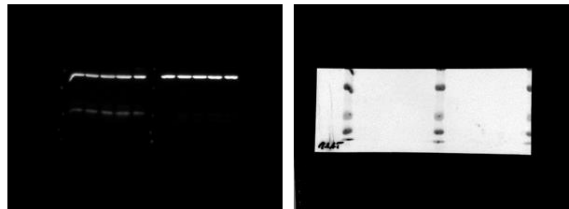

## Replicate 2

aTfR | ctrl

Anti-pZap70

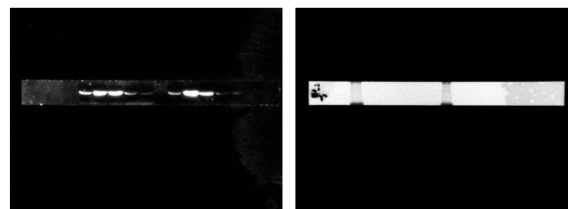

Anti-b-actin

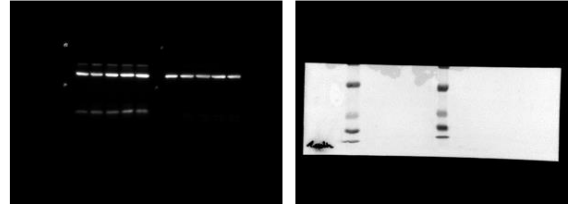

## Replicate 3

aTfR | ctrl

Anti-pZap70

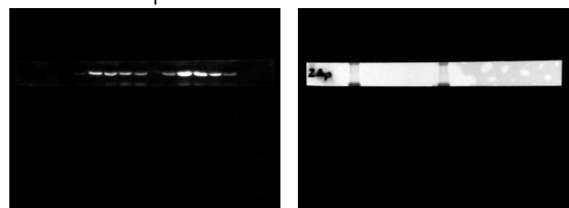

Anti-b-actin

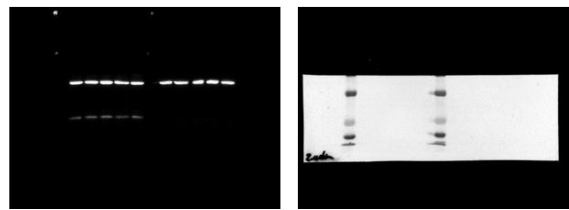

## Replicate 4

aTfR | ctrl

Anti-pZap70

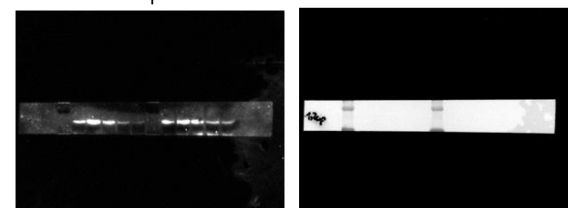

Anti-b-actin

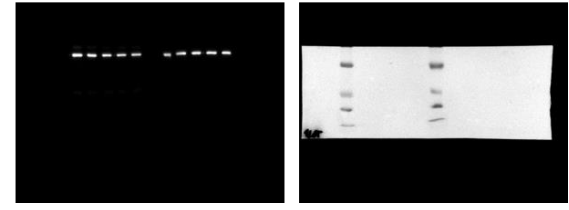

## Replicate 5

aTfR | ctrl

Anti-pZap70

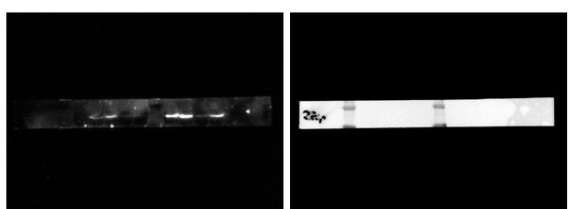

Anti-b-actin

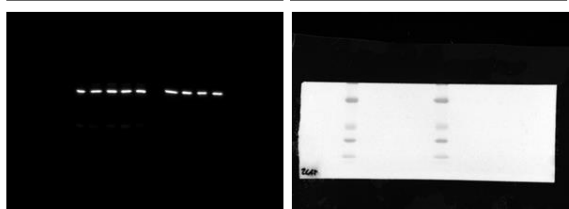

# Jurkat pLat

## Replicate 1

aTfR | ctrl

Anti-pLat

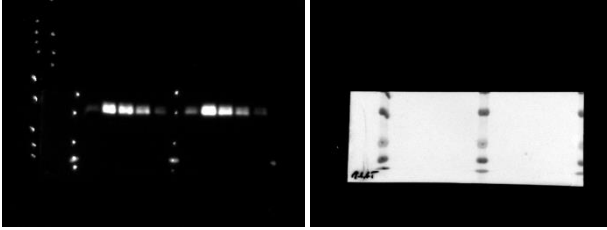

Anti-b-actin

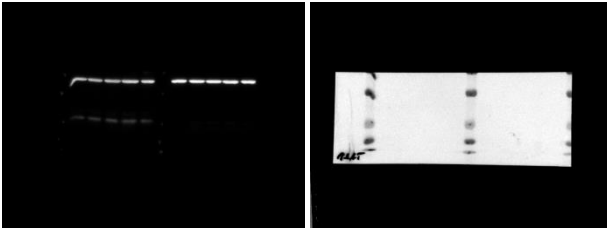

## Replicate 2

aTfR | ctrl

Anti-pLat

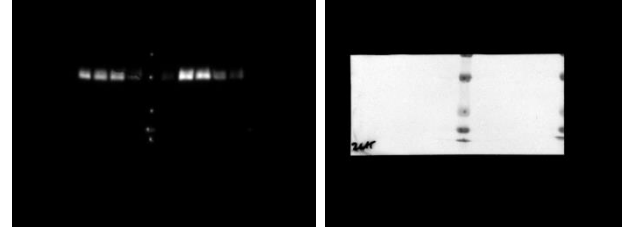

Anti-b-actin

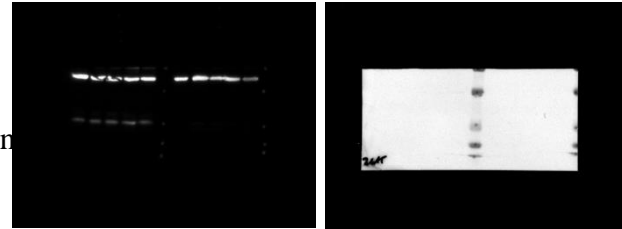

## Replicate 3

aTfR | ctrl

Anti-pLat

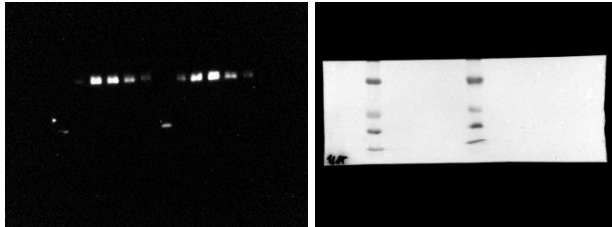

Anti-b-actin

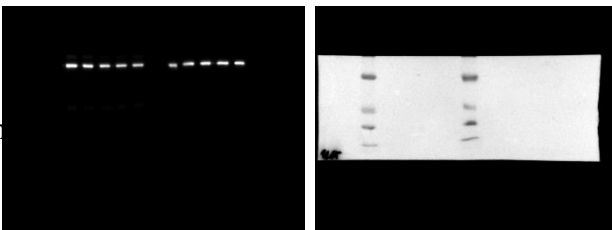

## Replicate 4

aTfR | ctrl

Anti-pLat

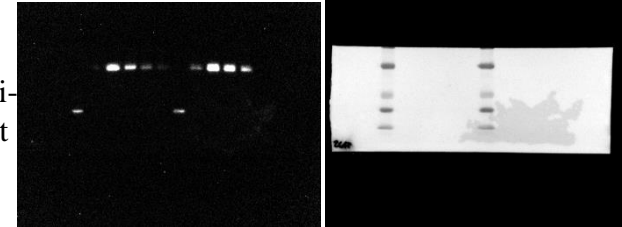

Anti-b-actin

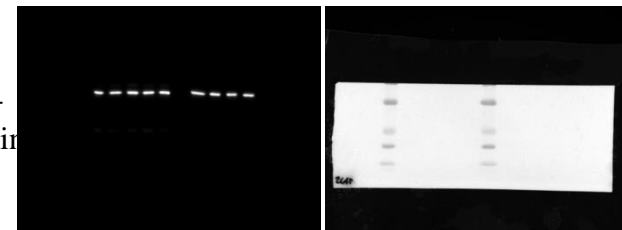

# Jurkat pSLP76

## Replicate 1

aTfR | ctrl

Anti-pSLP76

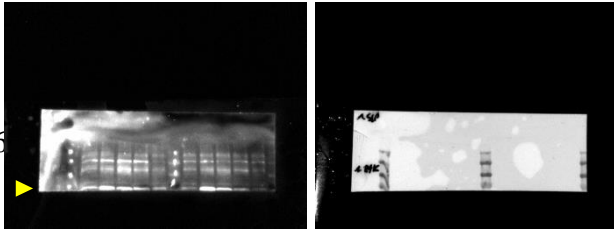

Anti-b-actin

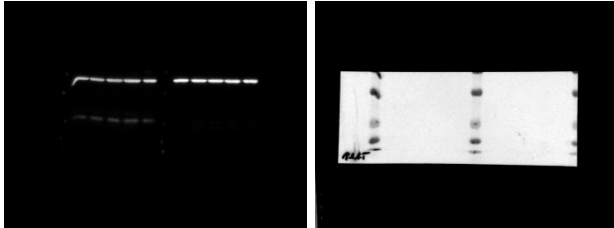

## Replicate 2

aTfR | ctrl

Anti-pSLP76

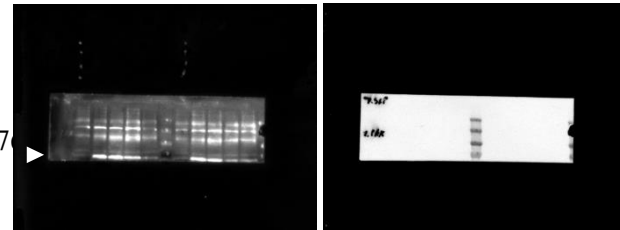

Anti-b-actin

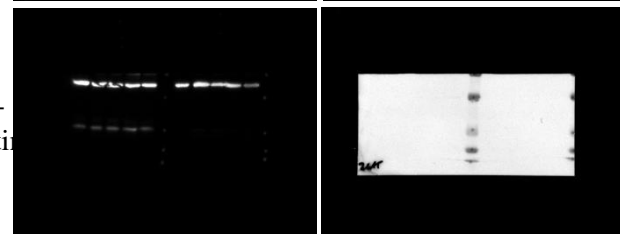

## Replicate 3

aTfR | ctrl

Anti-pSLP76

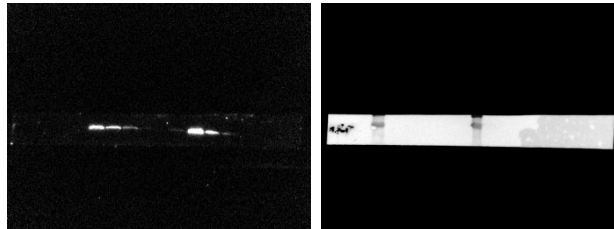

Anti-b-actin

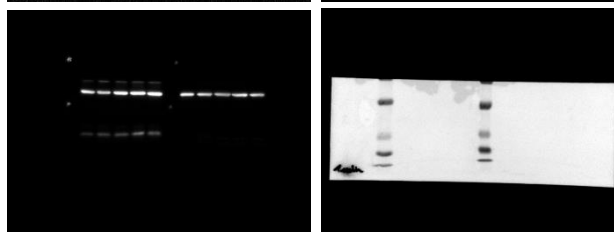

## Replicate 4

aTfR | ctrl

Anti-pSLP76

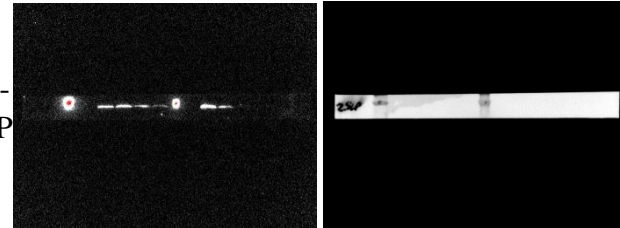

Anti-b-actin

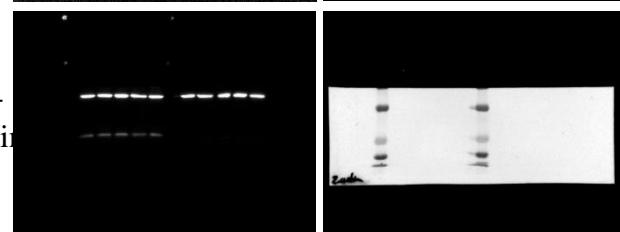

# Jurkat pVav1

## Replicate 1

aTfR | ctrl

Anti-pVav1

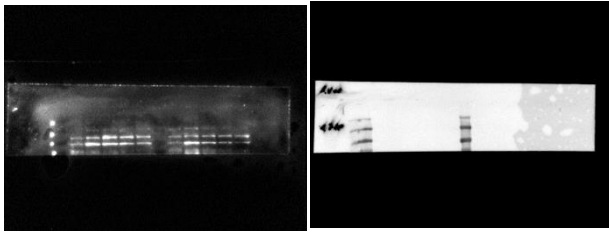

Anti-b-actin

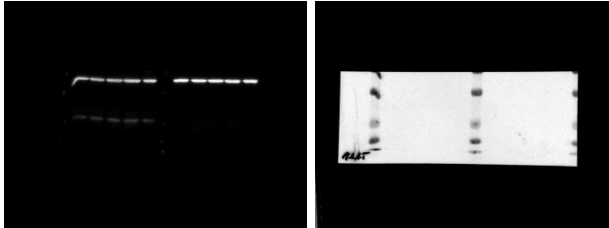

## Replicate 2

aTfR | ctrl

Anti-Vav1

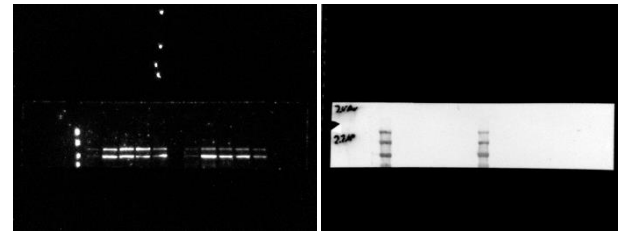

Anti-b-actin

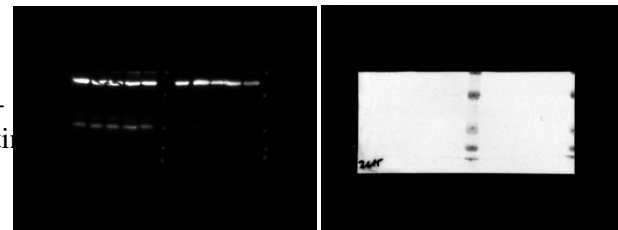

## Replicate 3

aTfR | ctrl

Anti-pVav1

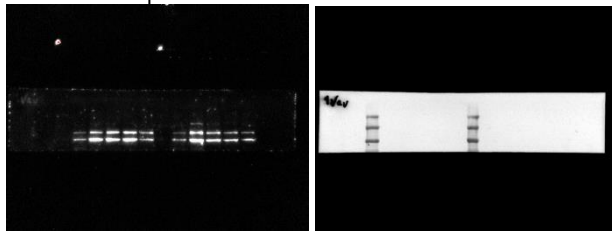

Anti-b-actin

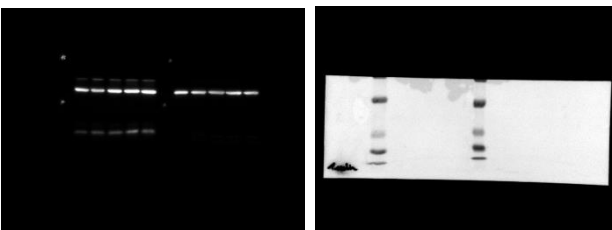

## Replicate 4

aTfR | ctrl

Anti-pVav1

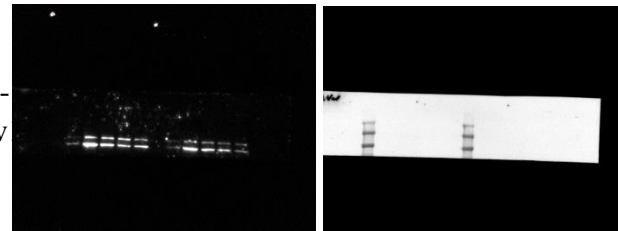

Anti-b-actin

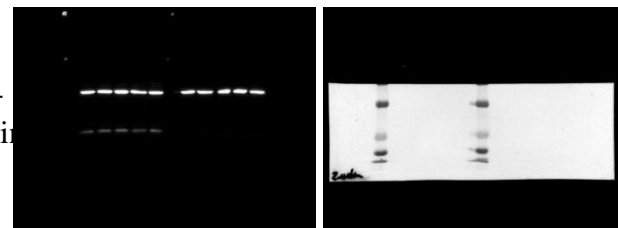

# Jurkat pSrc family

## Replicate 1

Ctrl | aTfR

Anti-pSrc fam

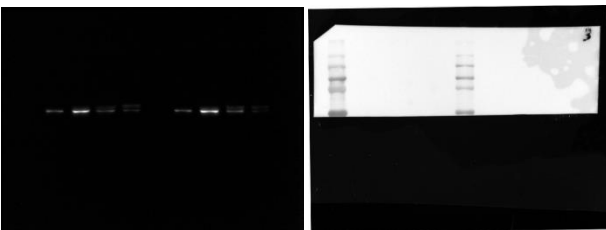

Anti-b-actin

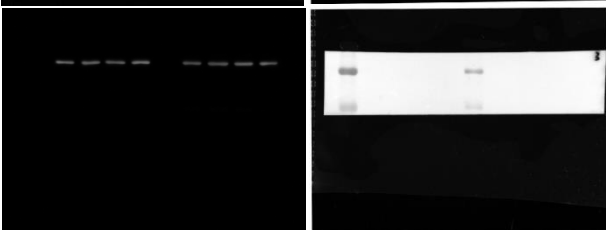

## Replicate 2

Ctrl | aTfR

Anti-pSrc fam

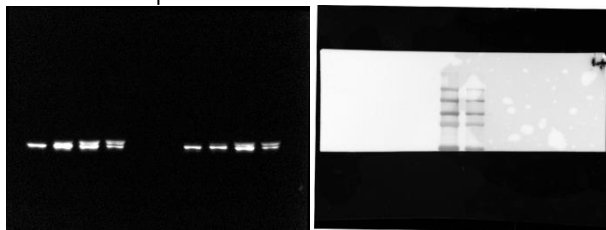

Anti-b-actin

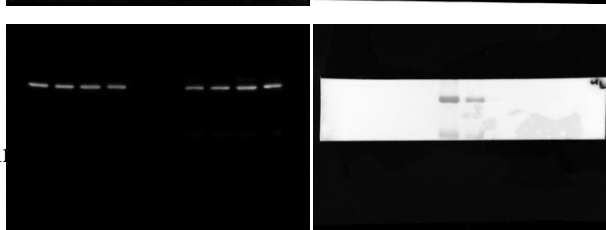

## Replicate 3

Ctrl | aTfR

Anti-pSrc family

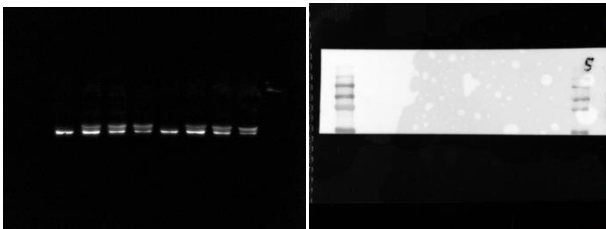

Anti-b-actin

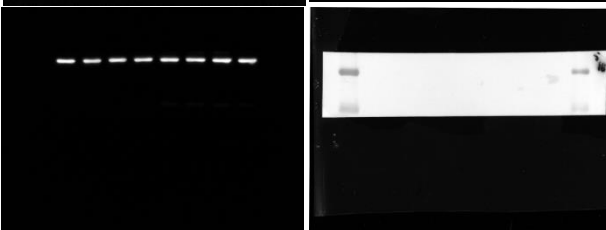

# Primary cells pZap70

DONOR 1

Ctrl | aTfR

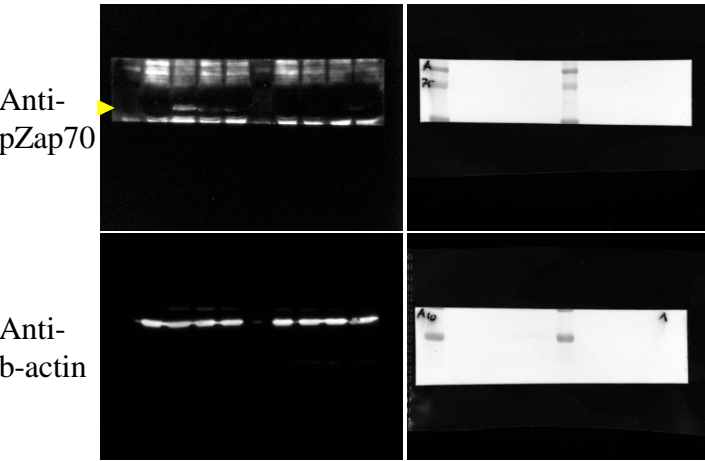

DONOR 2

Ctrl | aTfR

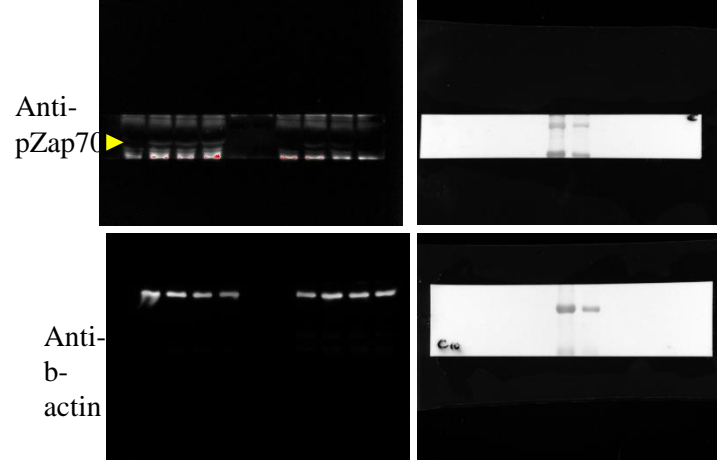

DONOR 3

Ctrl | aTfR

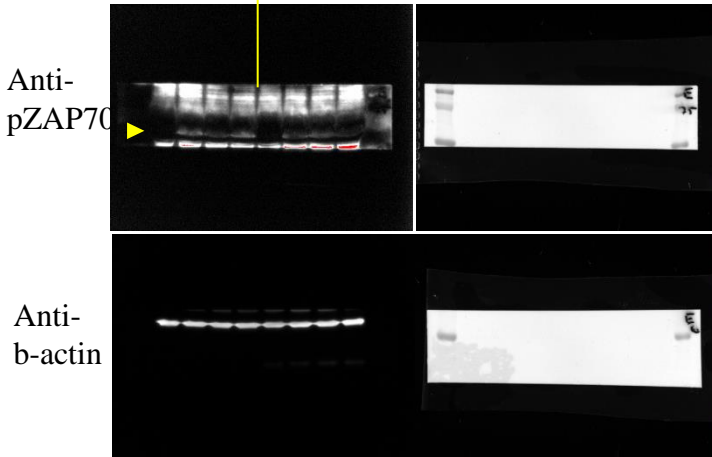

# Jurkat pPAK1/2

## Replicate 1

Ctrl | aTfR

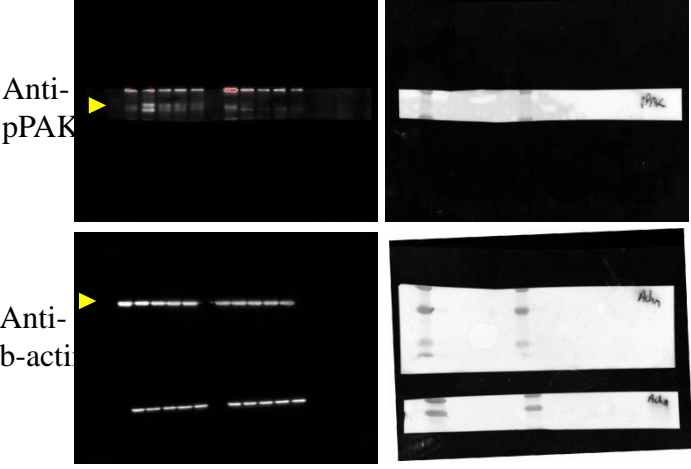

## Replicates 2+ 3

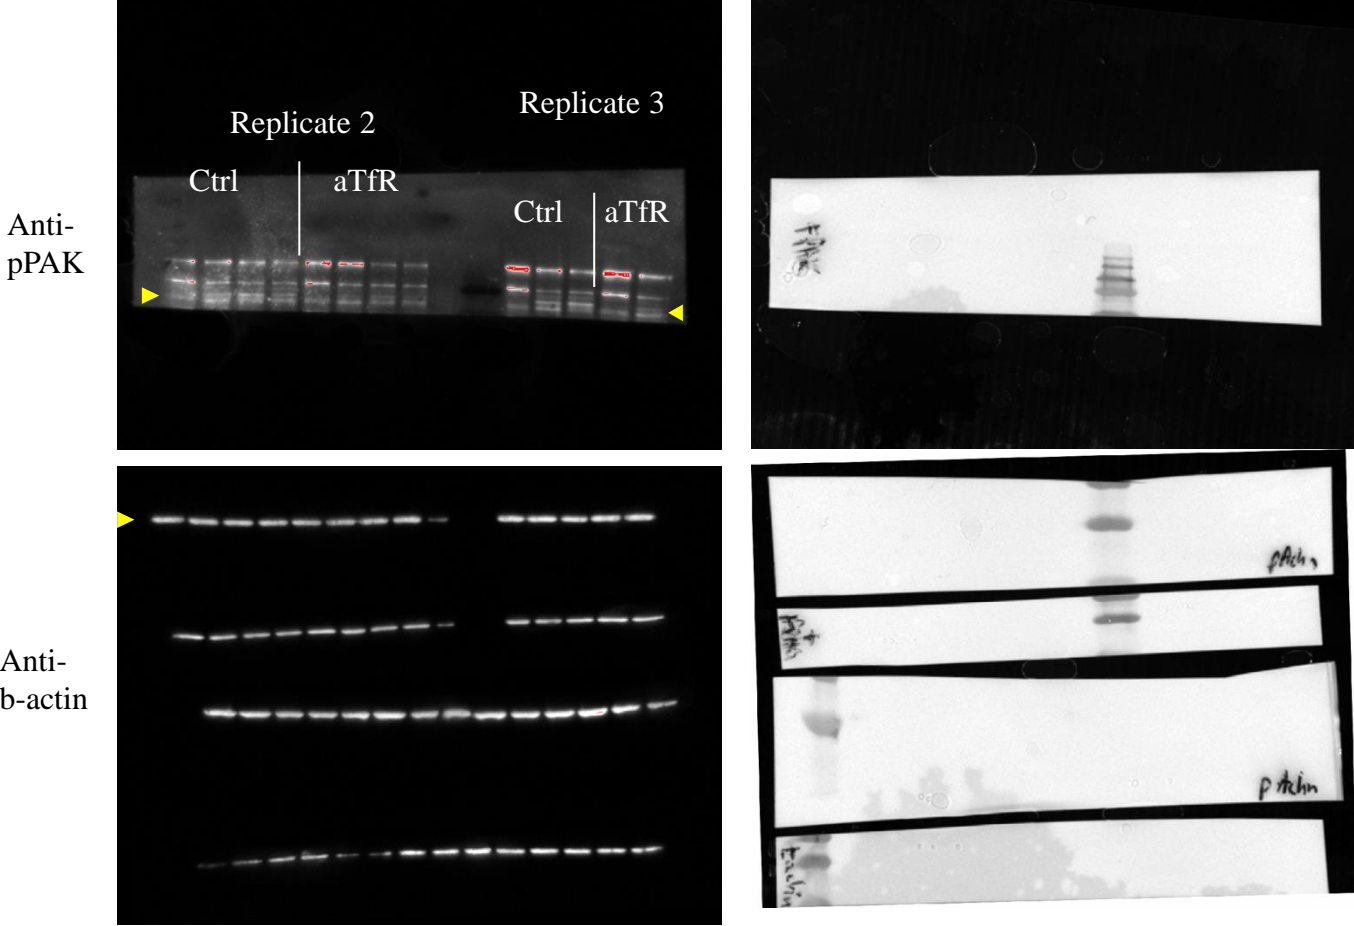

# Primary cells pPAK

DONOR 1

Ctrl | aTfR

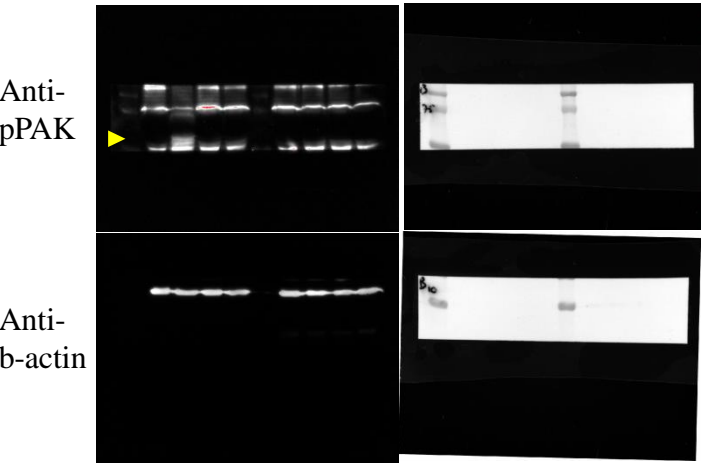

DONOR 4

Ctrl | aTfR

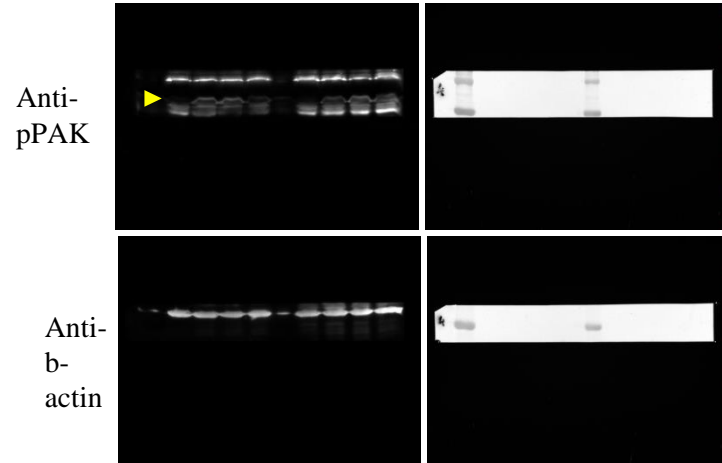

DONOR 5

Ctrl | aTfR

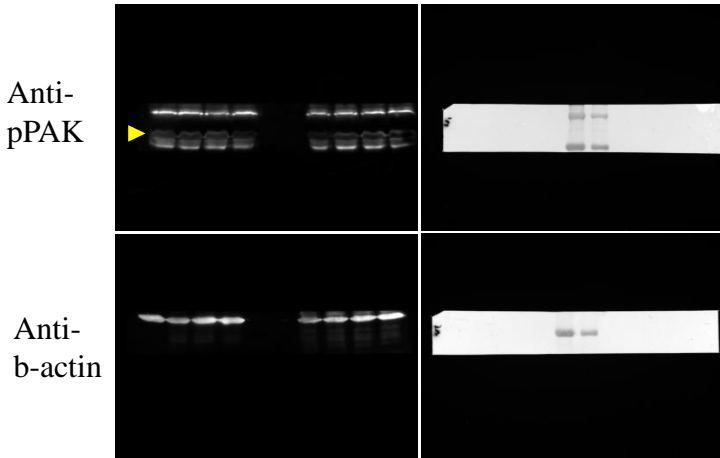

Supplement: 12915_2022_1386_MOESM2_ESM.pdf [file 12915_2022_1386_MOESM2_ESM.pdf]
